# Supplementary material
Source: Springer Nature journal article supplement (https://www.springermedizin.de/resource/supplementary/12936_2007_445_MOESM1_ESM.pdf/9547466)

*P. falciparum*

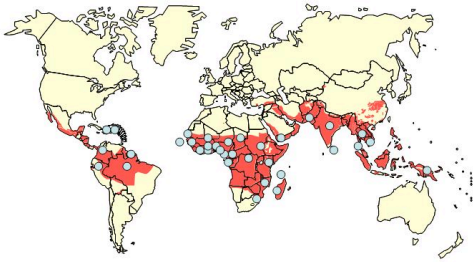

*P. vivax*

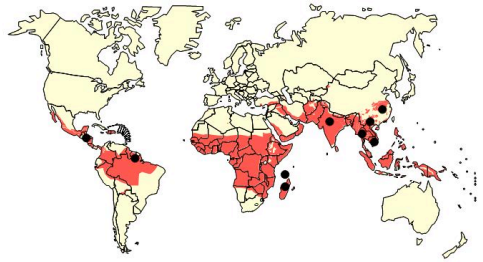

*P. malariae*

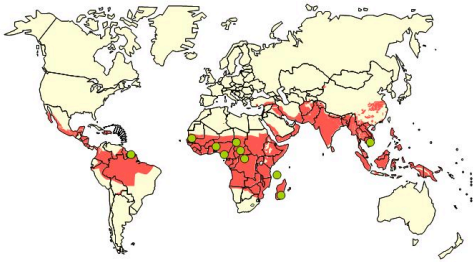

*P. ovale*

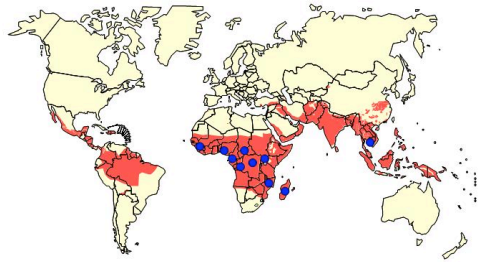

Supplement: MOESM1 [file 9547466]
